# Supplementary material for: Self-modification of g-C3N4 with its quantum dots for enhanced photocatalytic activity
Source: Royal Society of Chemistry journal article supplement (doi:10.1039/c8cy00351c), 2018-01-01
Supplement: c8cy00351c1.pdf [file c8cy00351c1.pdf]

## Supporting Information

### Self-modification of g-C<sub>3</sub>N<sub>4</sub> with its quantum dots for enhanced photocatalytic activity

Liang Zhou<sup>a</sup>, Yunhao Tian<sup>a</sup>, Juying Lei<sup>a\*</sup>, Lingzhi Wang<sup>b</sup>, Yongdi Liu<sup>a\*</sup>  
and Jinlong Zhang<sup>b\*</sup>

<sup>a</sup>State Environmental Protection Key Laboratory of Environmental Risk Assessment and Control on Chemical Process, School of Resources and Environmental Engineering, East China University of Science and Technology, 130 Meilong Road, Shanghai 200237, P. R. China. E-mail: lejuying@ecust.edu.cn, ydliu@ecust.edu.cn

<sup>b</sup>Key Lab for Advanced Materials and Institute of Fine Chemicals, East China University of Science and Technology, 130 Meilong Road, Shanghai 200237, P. R. China. E-mail: jlzhang@ecust.edu.cn

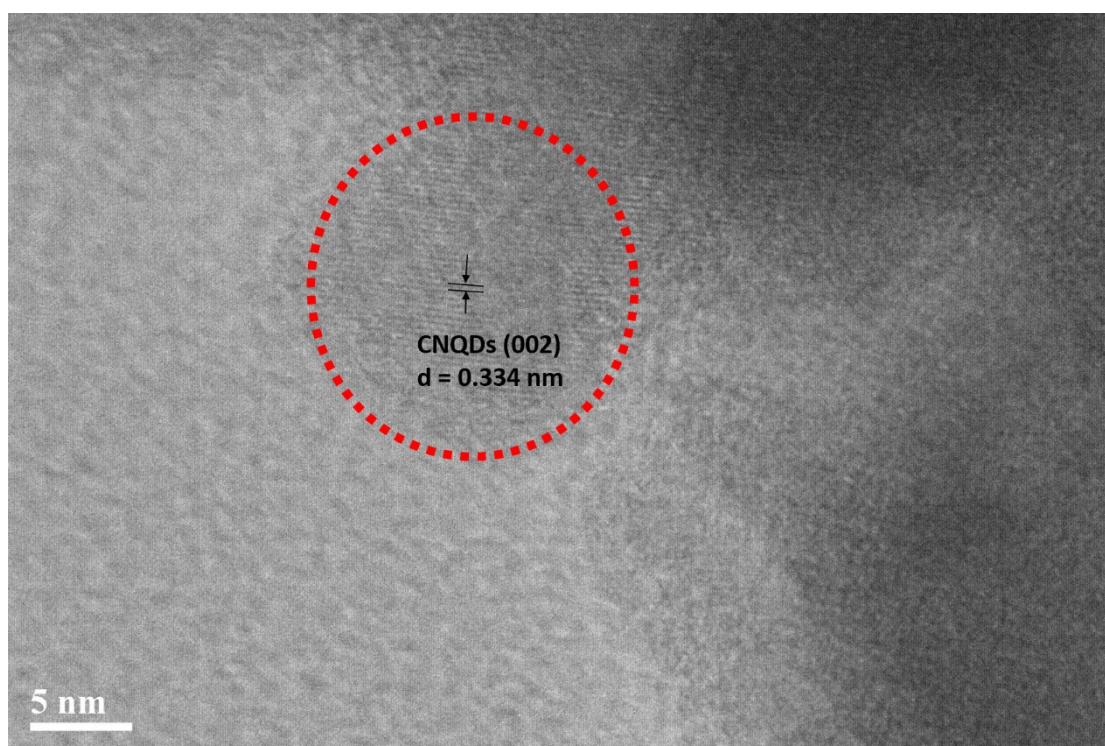

**Fig. S1** HRTEM of CNQDs/CN-20

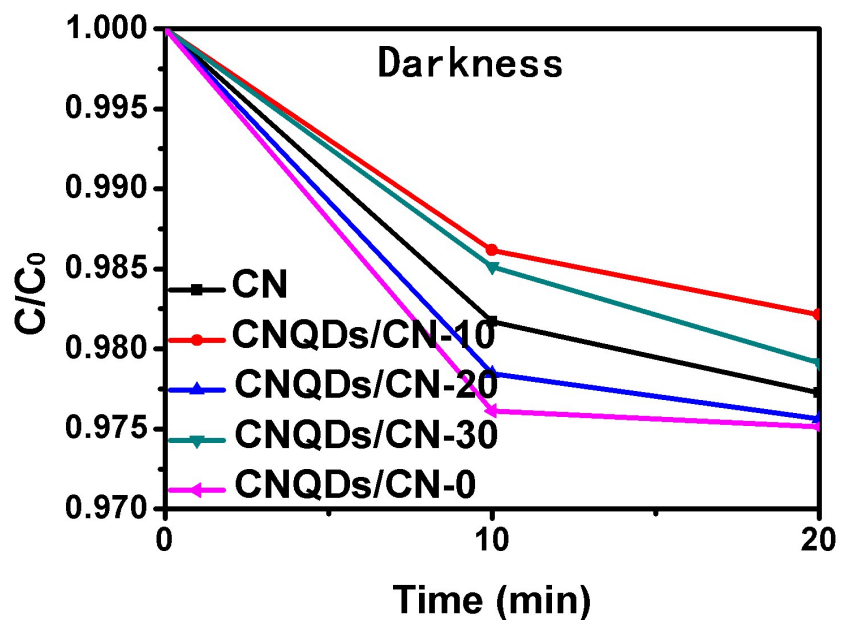

Fig. S2 The adsorption performance of different catalysts.
